# Supplementary material for: Interface engineering and efficiency improvement of monolayer graphene–silicon solar cells by inserting an ultra-thin LiF interlayer
Source: Royal Society of Chemistry journal article supplement (doi:10.1039/c5ra05619e), 2015-01-01
Supplement: c5ra05619e1.pdf [file c5ra05619e1.pdf]

## Interface engineering and efficiency improvement of monolayer graphene-silicon solar cells by inserting an ultra-thin LiF interlayer

Dikai Xu, Xuegong Yu\*, Lijian Zuo, Deren Yang

### Supporting Information

#### 1. Extraction the values of series resistances of solar cells

Relation between current density and voltage ( $J$ - $V$ ) under dark condition can be expressed by equation (S1.1) when series resistance ( $R_s$ ) is taken into account,<sup>1-3</sup>

$$J = J_s \left( \exp\left(\frac{q(V - JR_s)}{nkT}\right) - 1 \right) \quad (\text{S1.1})$$

where  $J_s$  is the reversed saturation current density,  $T$  the absolute temperature (298 K) and  $V - JR_s$  the voltage applied across the Schottky solar cells. For  $V - JR_s > 3kT/q$ , the  $J$ - $V$  relation becomes as follows,

$$J = J_s \exp\left[\frac{q(V - JR_s)}{nkT}\right] \quad (\text{S1.2})$$

Equation (S1.2) can be differentiated and rearranged into formula as follows,

$$\frac{dV}{d(\ln J)} = R_s A_{\text{eff}} J + \frac{nkT}{q} \quad (\text{S1.3})$$

where  $A_{\text{eff}}$  is effective area of Schottky solar cells. The value of  $R_s$  is obtained from slope of  $dV/d(\ln J)$  versus  $J$  curves.

#### 2. Calculation of the values of contact resistances

The values of contact resistance,  $\rho_c$ , for the Al/Si direct contact and the Al/LiF/Si

contact, are extracted by the transmission line model method.<sup>4</sup> Detailed extraction process is described as follows. Current-voltage ( $I$ - $V$ ) curves between two contacts with length  $d$  and width  $W$  were measured by a probing station. As shown in the inset of Figure 5, the distance between Al electrodes were 100, 200, 300, *etc.* then finally 600  $\mu\text{m}$ . The total resistances,  $R_T$ , between every two electrodes are derived from the  $I$ - $V$  curves, correspondingly. The contact resistance,  $R_C$ , can be obtained by fitting equation (S2.1) as follows,

$$R_T = 2R_C + R_{sh}d/W \quad (\text{S2.1})$$

where the  $R_{sh}$  is the sheet resistance of Si and  $d$  the distances between two electrodes.

The value of  $L_T$  is obtained by equation (S2.2) and (S2.3) as follows,

$$R_E = \frac{1}{2}(R_1 + R_2 - R_3) \quad (\text{S2.2})$$

$$R_C/R_E = \cosh(d/L_T) \quad (\text{S2.3})$$

where  $R_E$  is the contact end resistance,  $L_T$  the transfer length and  $d$  the length of electrodes. Schematic diagram of  $R_1$ ,  $R_2$  and  $R_3$  is shown in Figure S1. Eventually,  $\rho_C$  is extracted from equation (S2.4),

$$\rho_C = R_E L_T W \sinh(d/L_T) \quad (\text{S2.4})$$

The calculated contact resistances for the Al/Si and Al/LiF/Si contact were  $1.9 \times 10^{-1} \Omega \text{ cm}^2$  and  $6.3 \times 10^{-2} \Omega \text{ cm}^2$ , respectively.

Table S1. Summary of photovoltaic parameters of devices with 0.5 nm and 1.2 nm LiF interlayer fabricated in the same batch.

| Nominal thickness<br>Of LiF interlayer | $V_{OC}$ (mV) | $J_{SC}$ (mA/cm <sup>2</sup> ) | $FF$ (%) | PCE (%) |
|----------------------------------------|---------------|--------------------------------|----------|---------|
| 1.2 nm                                 | 403.86        | 24.93                          | 45.00    | 4.53    |
|                                        | 386.28        | 26.74                          | 44.58    | 4.60    |
|                                        | 405.20        | 26.18                          | 46.15    | 4.89    |
| 0.5 nm                                 | 400.42        | 26.29                          | 53.06    | 5.58    |
|                                        | 405.34        | 24.83                          | 54.50    | 5.48    |
|                                        | 430.97        | 27.17                          | 49.66    | 5.81    |

Table S2. Summary of photovoltaic parameters of devices during one week storing.

| Gr-Si<br>Solar cells   | Storing<br>time<br>(day) | $V_{OC}$ (mV) | $J_{SC}$ (mA/cm <sup>2</sup> ) | $FF$ (%) | PCE (%) |
|------------------------|--------------------------|---------------|--------------------------------|----------|---------|
| Pristine-1             | 0                        | 327.75        | 24.30                          | 45.23    | 3.60    |
|                        | 1                        | 400.21        | 25.50                          | 53.45    | 5.45    |
|                        | 2                        | 389.11        | 25.08                          | 53.18    | 5.19    |
|                        | 3                        | 405.34        | 24.83                          | 54.50    | 5.48    |
|                        | 7                        | 438.45        | 24.40                          | 50.18    | 5.37    |
| Pristine-2             | 0                        | 347.26        | 27.70                          | 47.57    | 4.58    |
|                        | 1                        | 408.61        | 27.03                          | 54.95    | 6.07    |
|                        | 2                        | 400.26        | 27.88                          | 52.55    | 5.86    |
|                        | 3                        | 424.83        | 27.11                          | 54.23    | 6.25    |
|                        | 7                        | 423.07        | 28.87                          | 48.98    | 5.98    |
| HNO <sub>3</sub> Doped | 0                        | 490.57        | 27.86                          | 66.92    | 9.15    |
|                        | 1                        | 462.44        | 23.90                          | 39.43    | 4.36    |

**References:**

1. A. Tataroğlu and Ş. Altındal, *Microelectron Eng*, 2008, **85**, 233-237.
2. D. Pysch, A. Mette and S. W. Glunz, *Sol Energ Mat Sol C*, 2007, **91**, 1698-1706.
3. Y. Zhang, W. Cui, Y. Zhu, F. Zu, L. Liao, S.-T. Lee and B. Sun, *Energy Environ. Sci.*, 2014.
4. G. K. Reeves and H. B. Harrison, *Electron Device Letters*, 1982, **3**, 111-113.

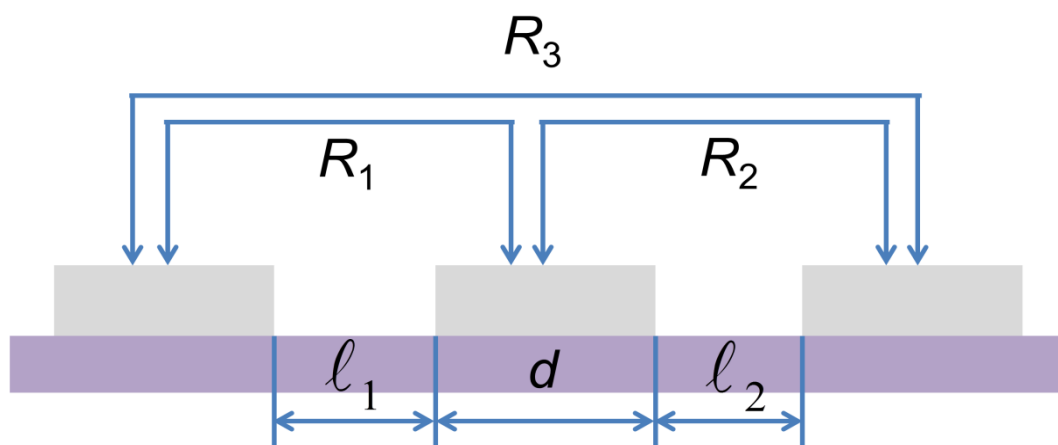

Figure. S1

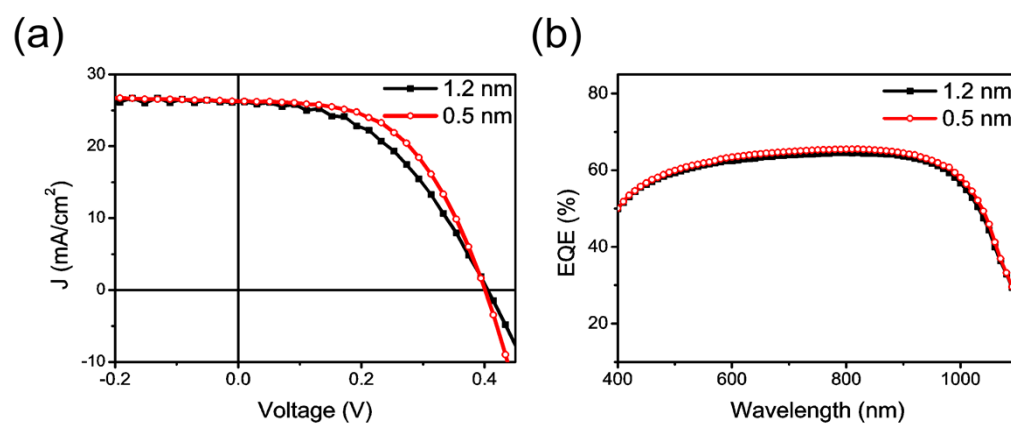

Figure S2.
